# Supplementary material for: Synthesis of Aminobisphosphinates through a Cascade Reaction between Hypophosphorous Acid and Bis(trimethylsilyl)imidates Mediated by ZnI2
Source: MDPI journal article supplement (doi:10.3390/molecules28176226), 2023-08-24
Supplement: s1 [file s1]

# Synthesis of Aminobisphosphinates through a Cascade Reaction between Hypophosphorous Acid and Bis(trimethylsilyl)imidates Mediated by $\text{ZnI}_2$

## *.Supporting Information*

- 1) NMR monitoring of imidate formation 2b 2
- 2) NMR data of 1-aminomethylene-1,1-bis(H-phosphinate) disodium salts 3a-l.....3

# 1) NMR monitoring of imidate formation 2b

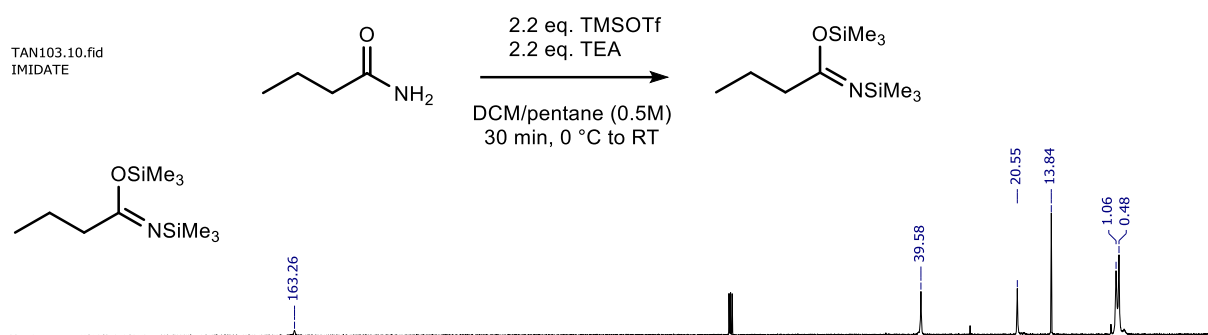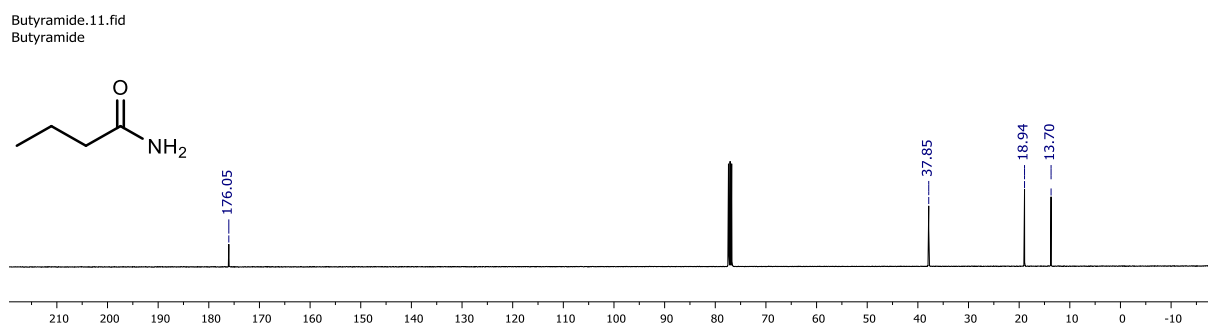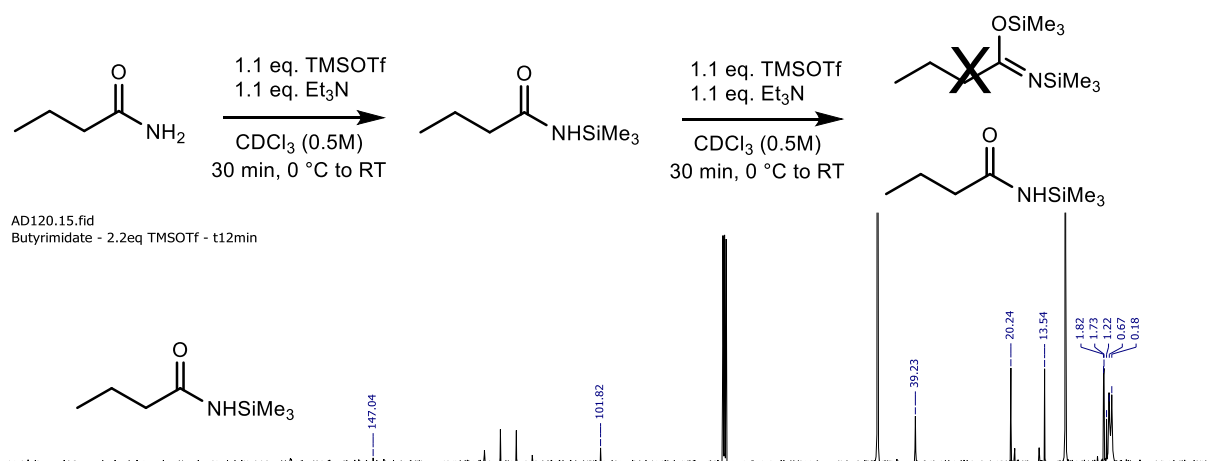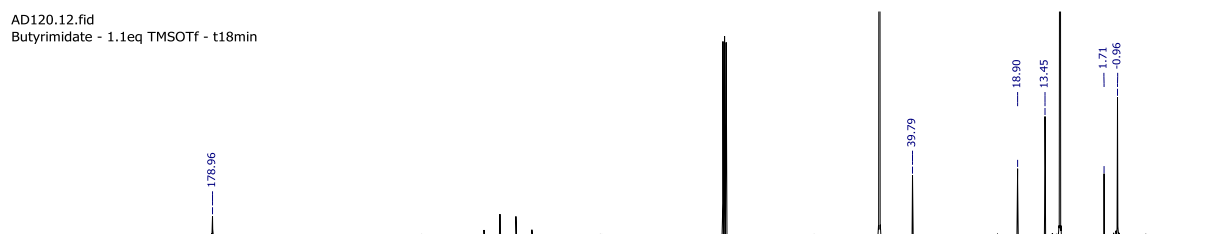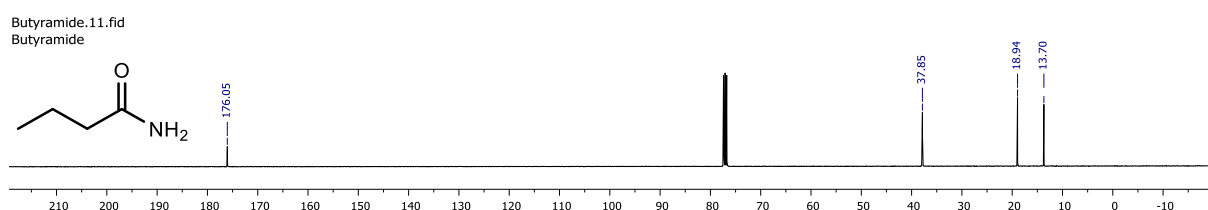

## 2) NMR data of 1-aminomethylene-1,1-bis(H-phosphinate) disodium salts 3a-l

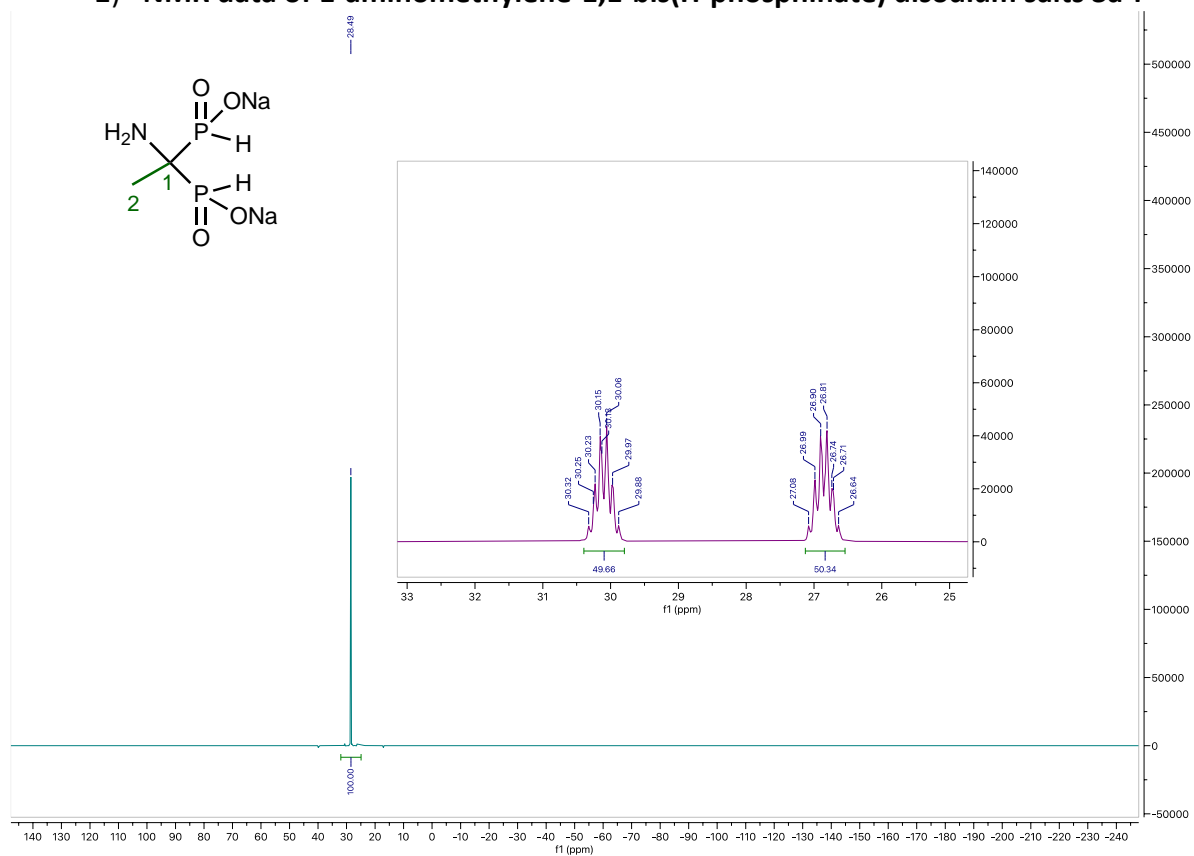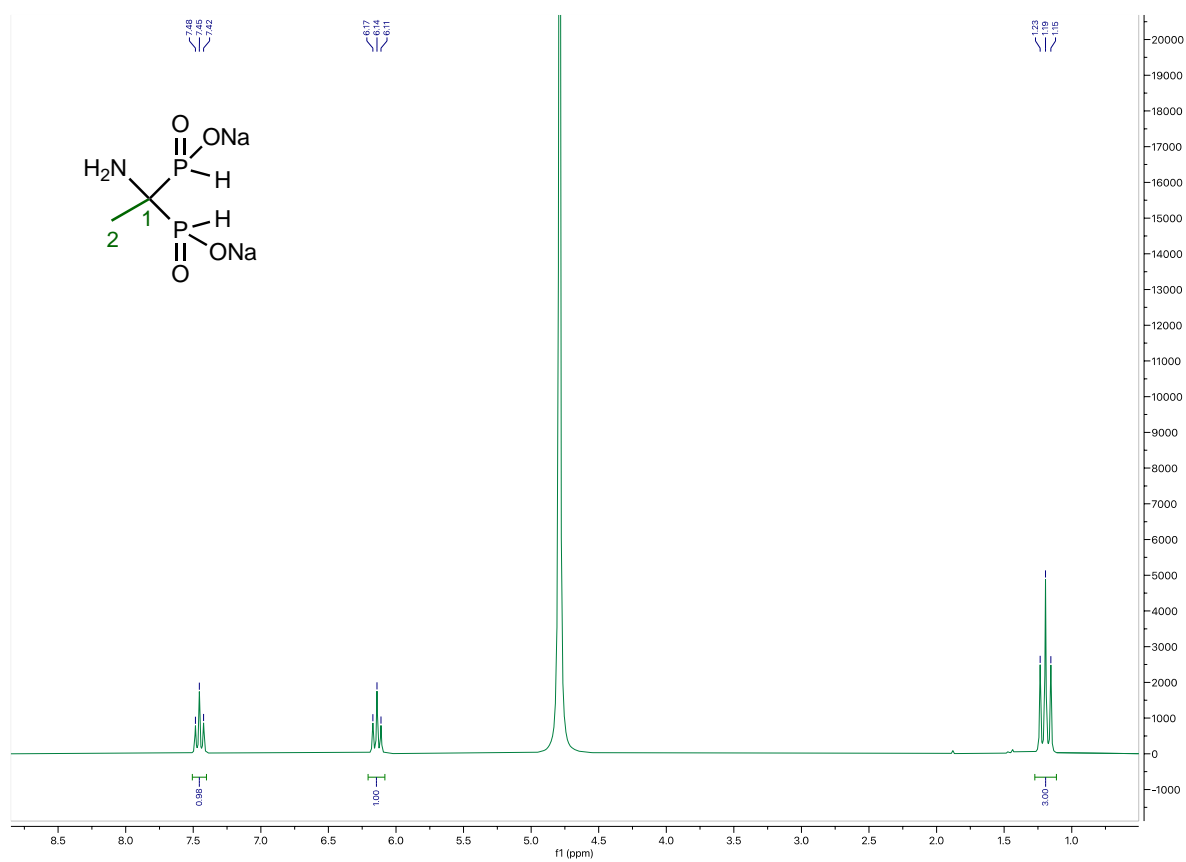

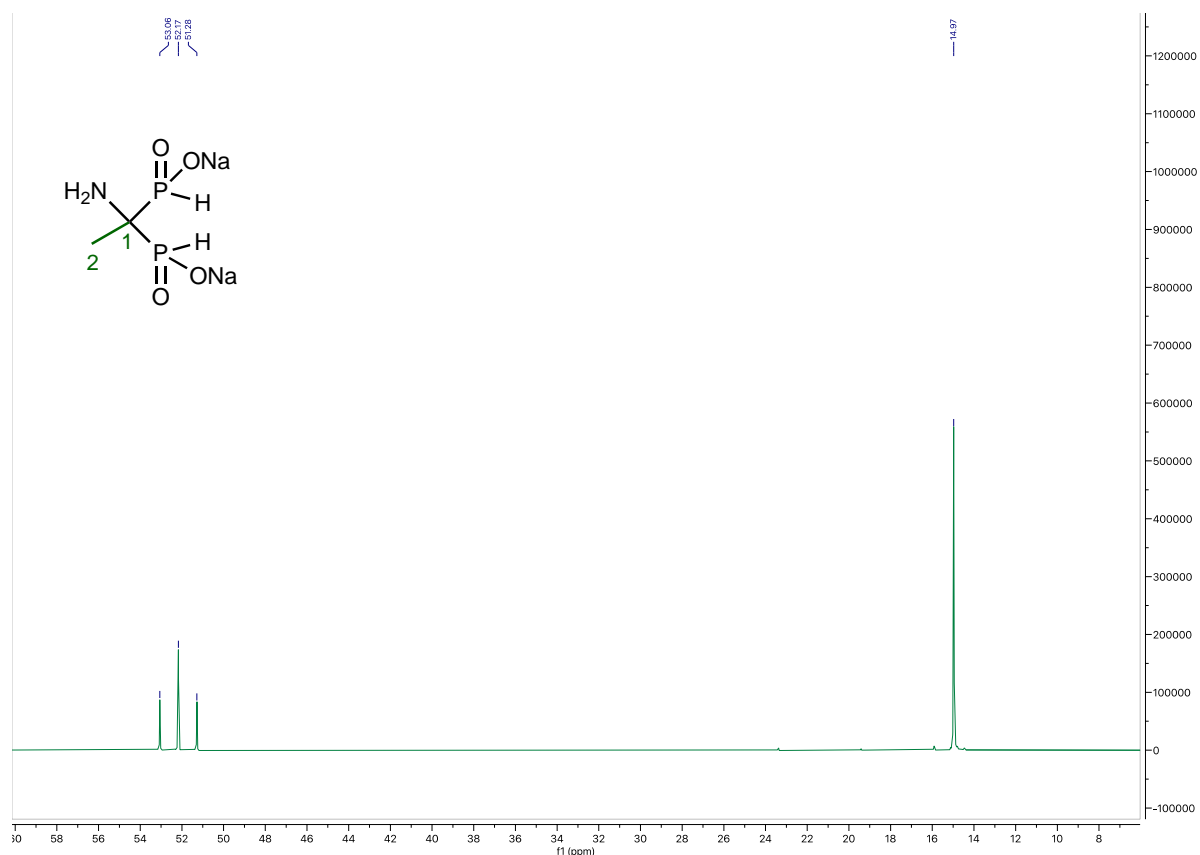

**Figure S1.** <sup>31</sup>P NMR spectrum (162 MHz, D<sub>2</sub>O), <sup>1</sup>H NMR spectrum (400MHz, D<sub>2</sub>O), <sup>13</sup>C NMR (101 MHz, D<sub>2</sub>O) of 1-aminoethane-1,1-bis(H-phosphinate) disodium salts **3a**.

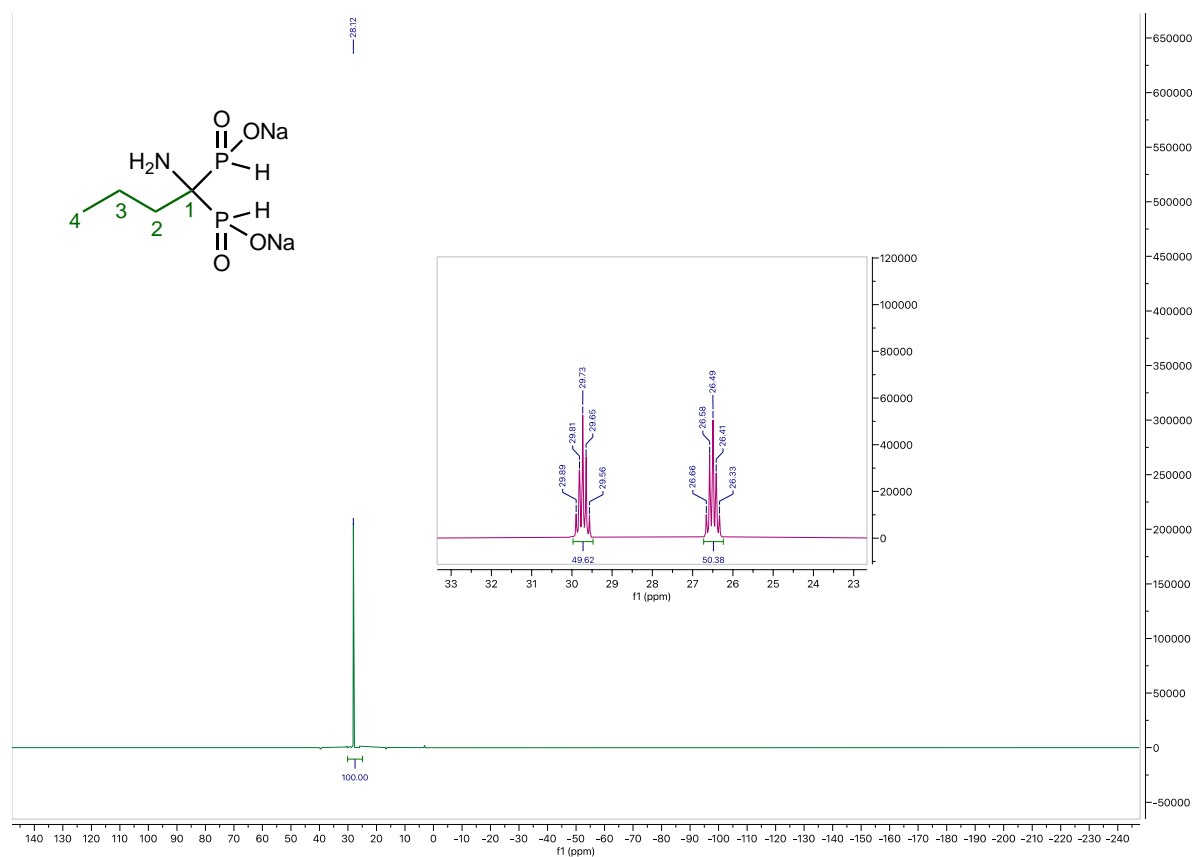

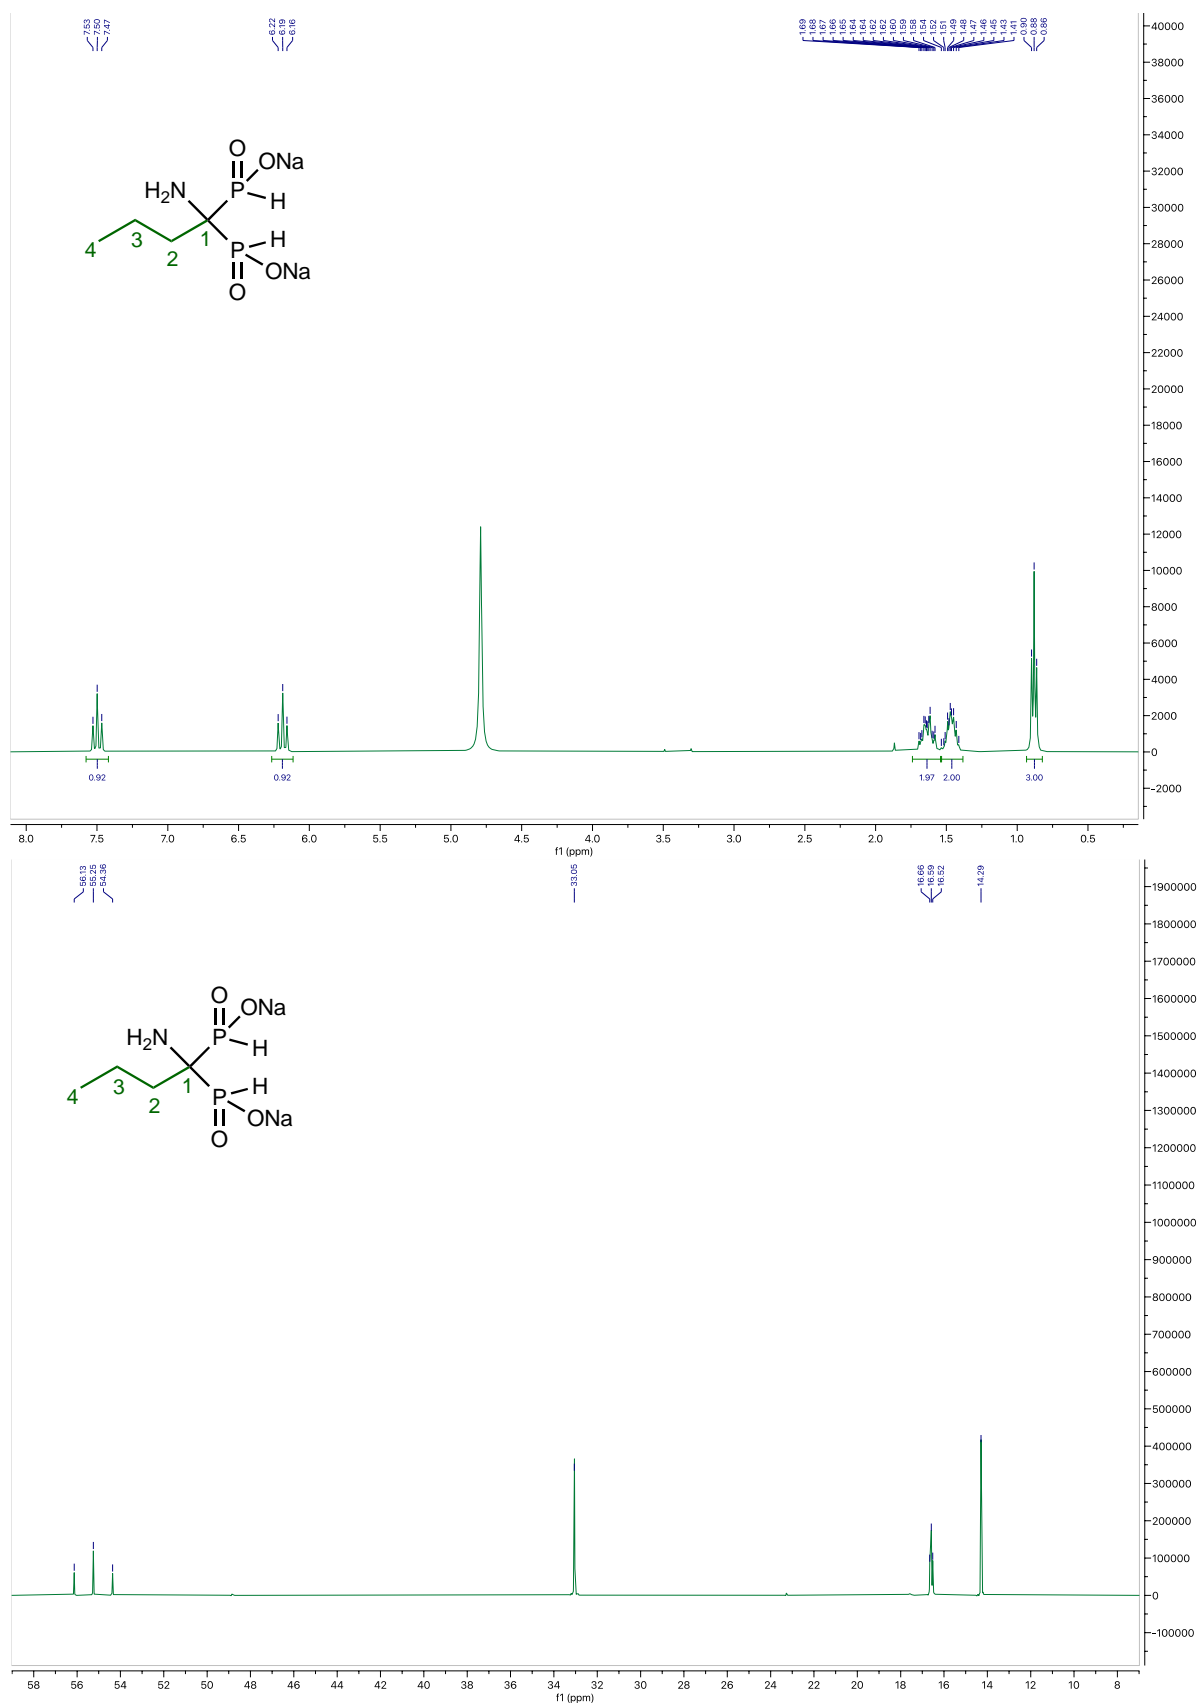

**Figure S2.** <sup>31</sup>P NMR spectrum (162 MHz, D<sub>2</sub>O), <sup>1</sup>H NMR spectrum (400 MHz, D<sub>2</sub>O), <sup>13</sup>C NMR (101 MHz, D<sub>2</sub>O) of 1-amino-1-propylmethane-1,1-bis(H-phosphinate) disodium salts **3b**.

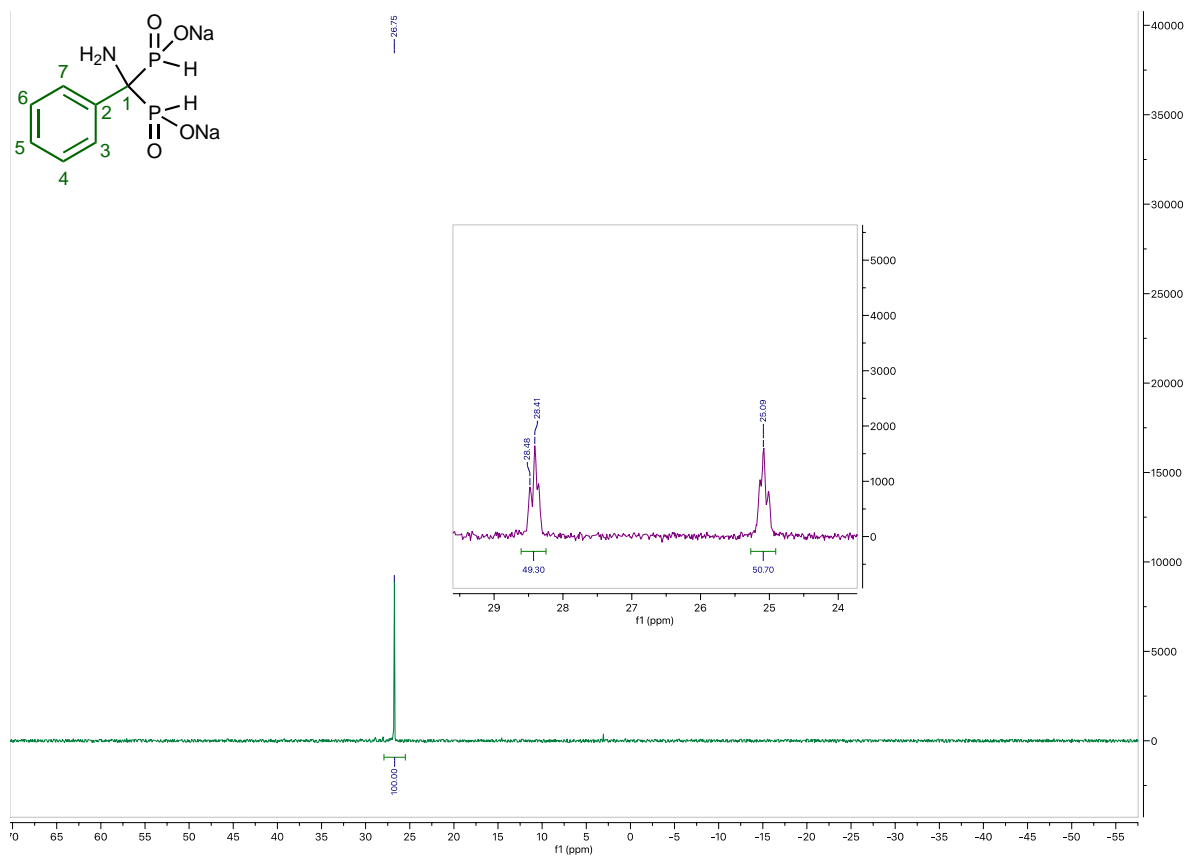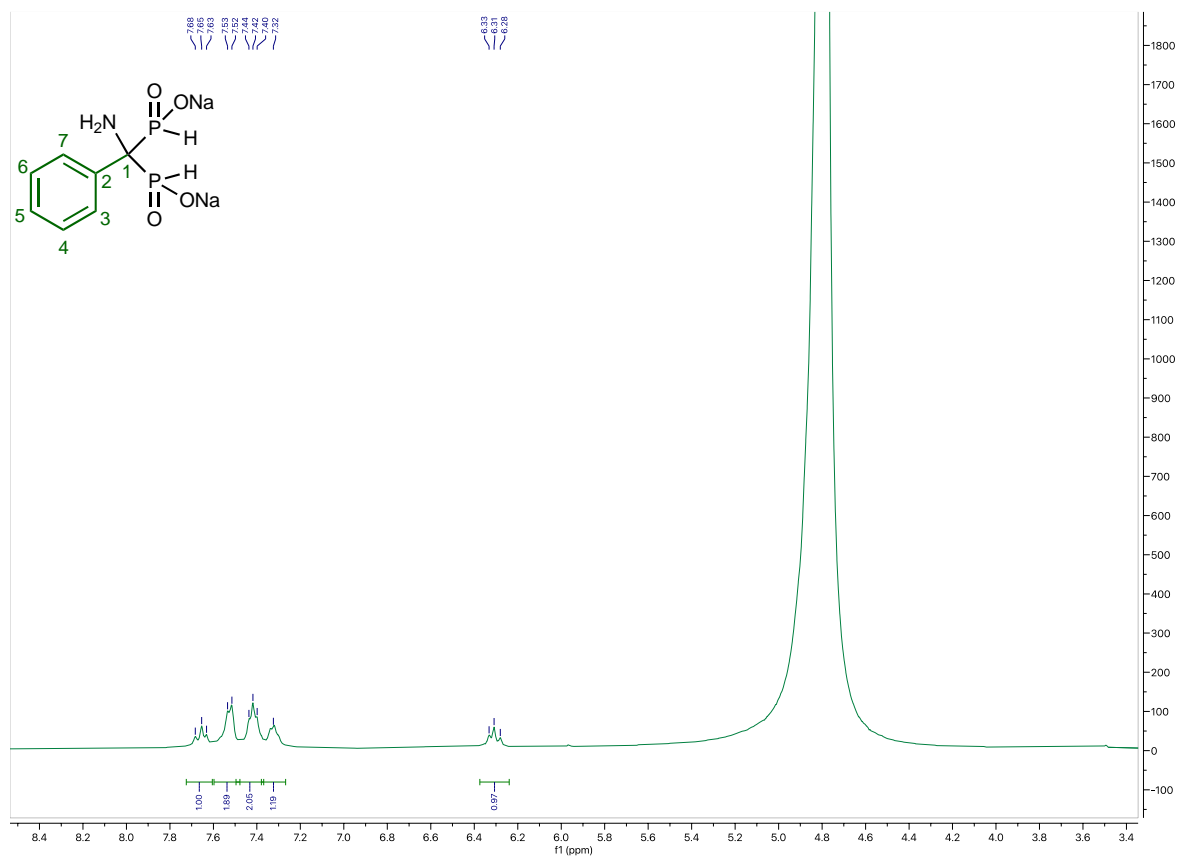

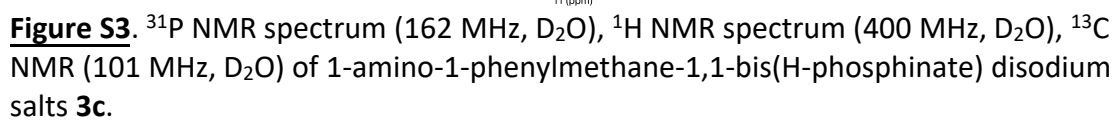





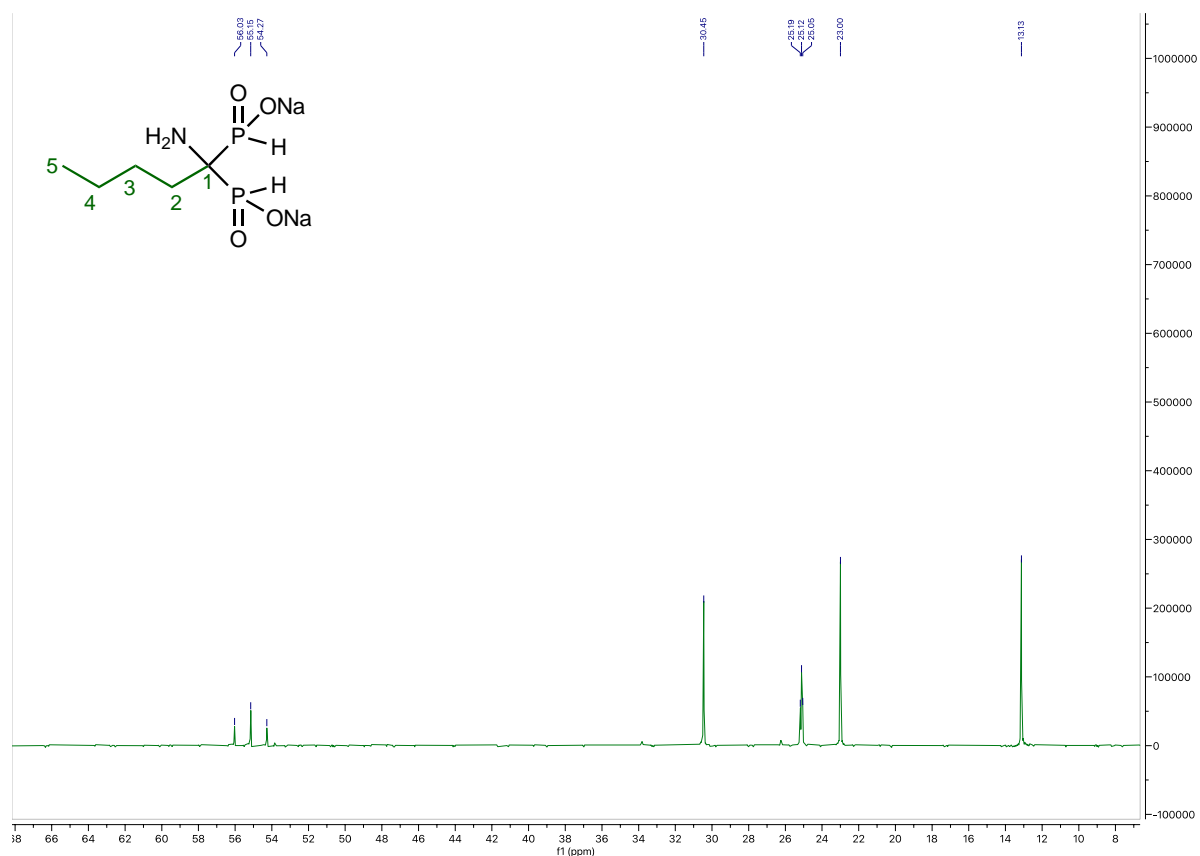

**Figure S4.**  $^{31}\text{P}$  NMR spectrum (162 MHz,  $\text{D}_2\text{O}$ ),  $^1\text{H}$  NMR spectrum (400 MHz,  $\text{D}_2\text{O}$ ),  $^{13}\text{C}$  NMR (101 MHz,  $\text{D}_2\text{O}$ ) of 1-amino-1-butylmethane-1,1-bis(H-phosphinate) disodium salts **3d**.

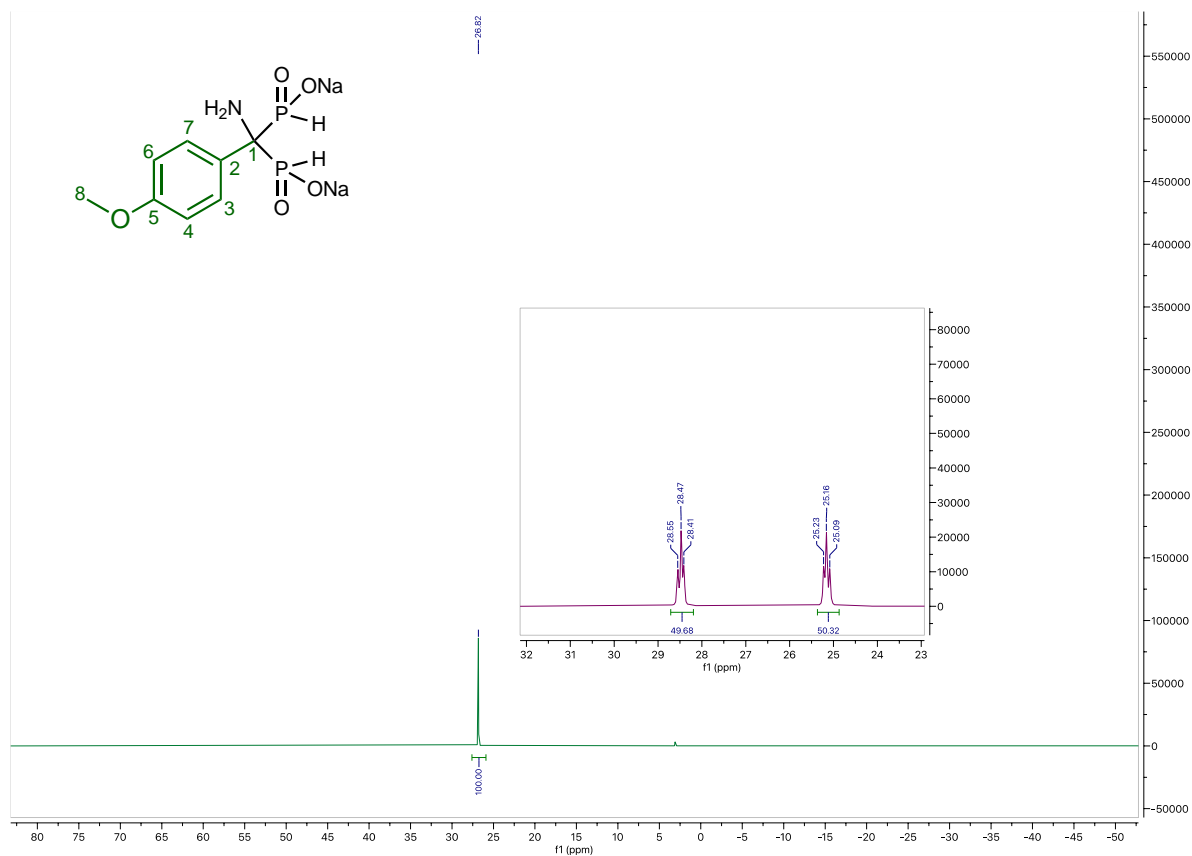

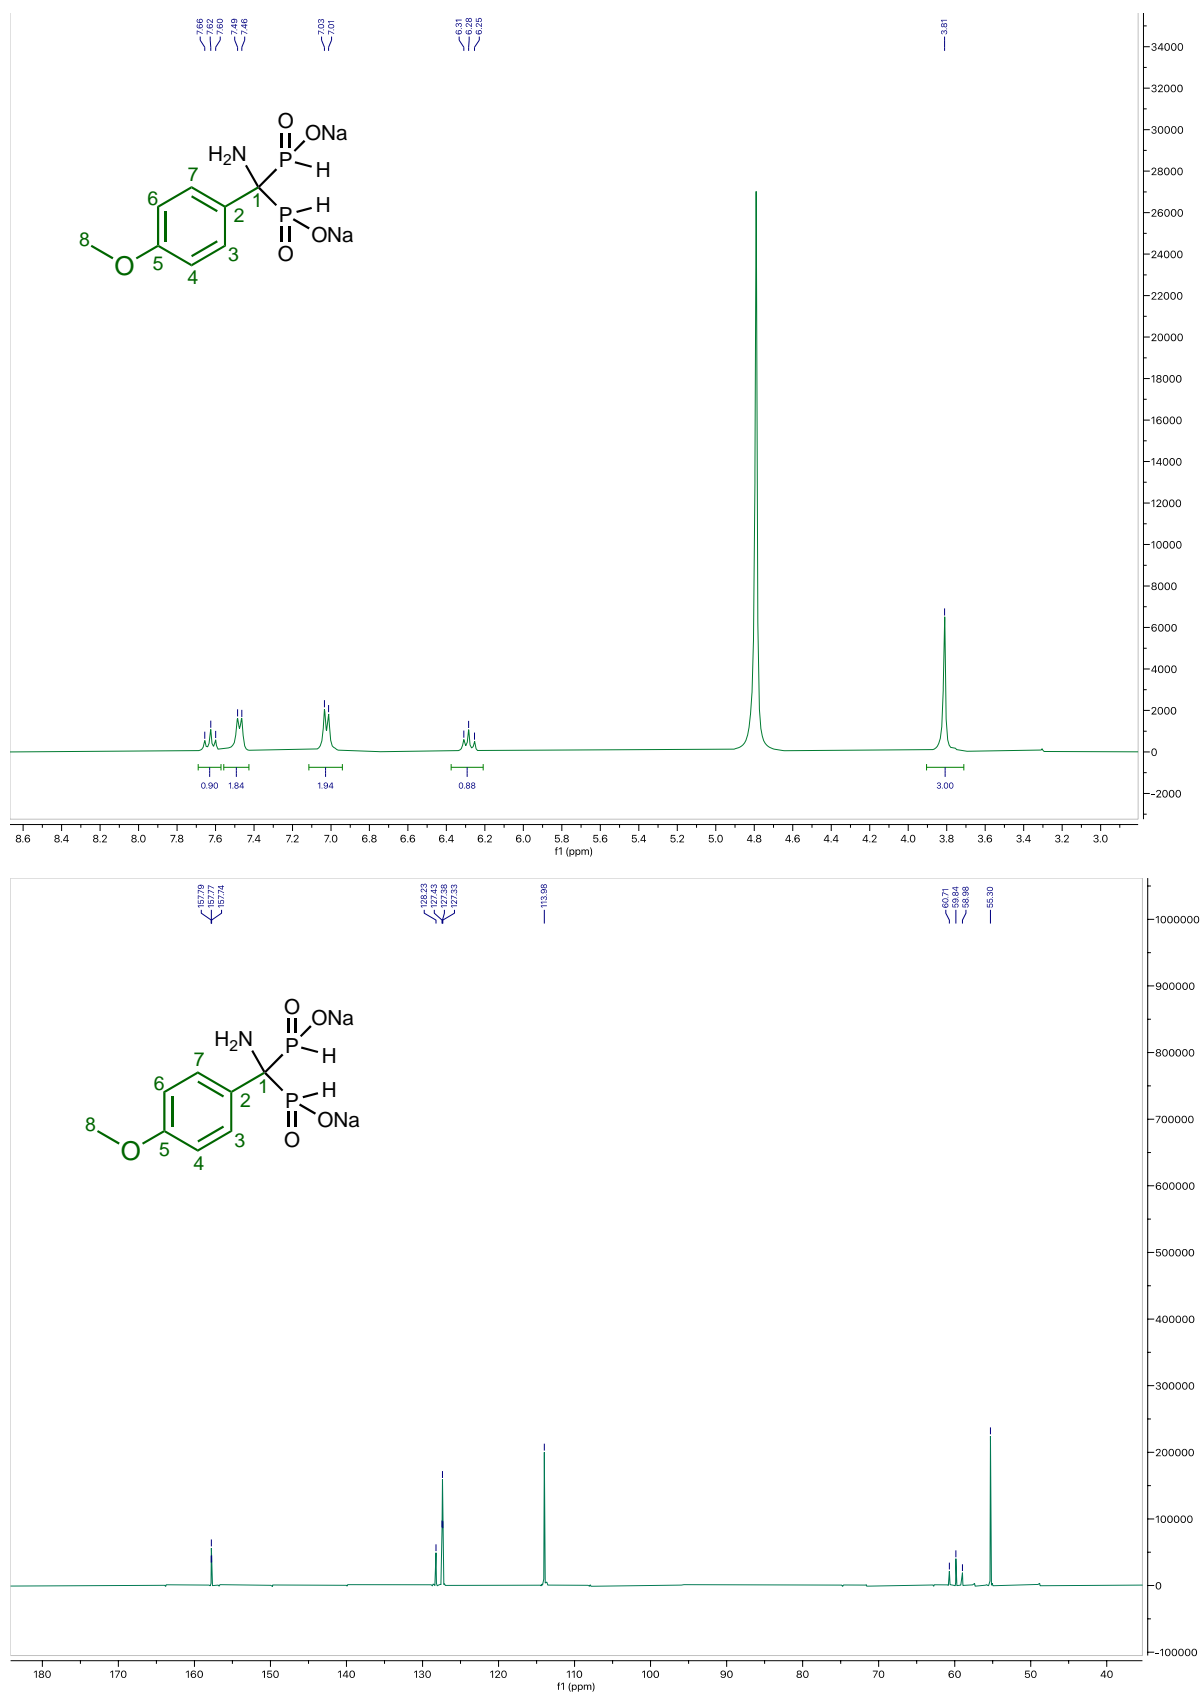

**Figure S5.** <sup>31</sup>P NMR spectrum (162 MHz, D<sub>2</sub>O), <sup>1</sup>H NMR spectrum (400 MHz, D<sub>2</sub>O), <sup>13</sup>C NMR (101 MHz, D<sub>2</sub>O) of 1-amino-1-(4-methoxyphenyl)methane-1,1-bis(H-phosphinate) disodium salts **3f**.

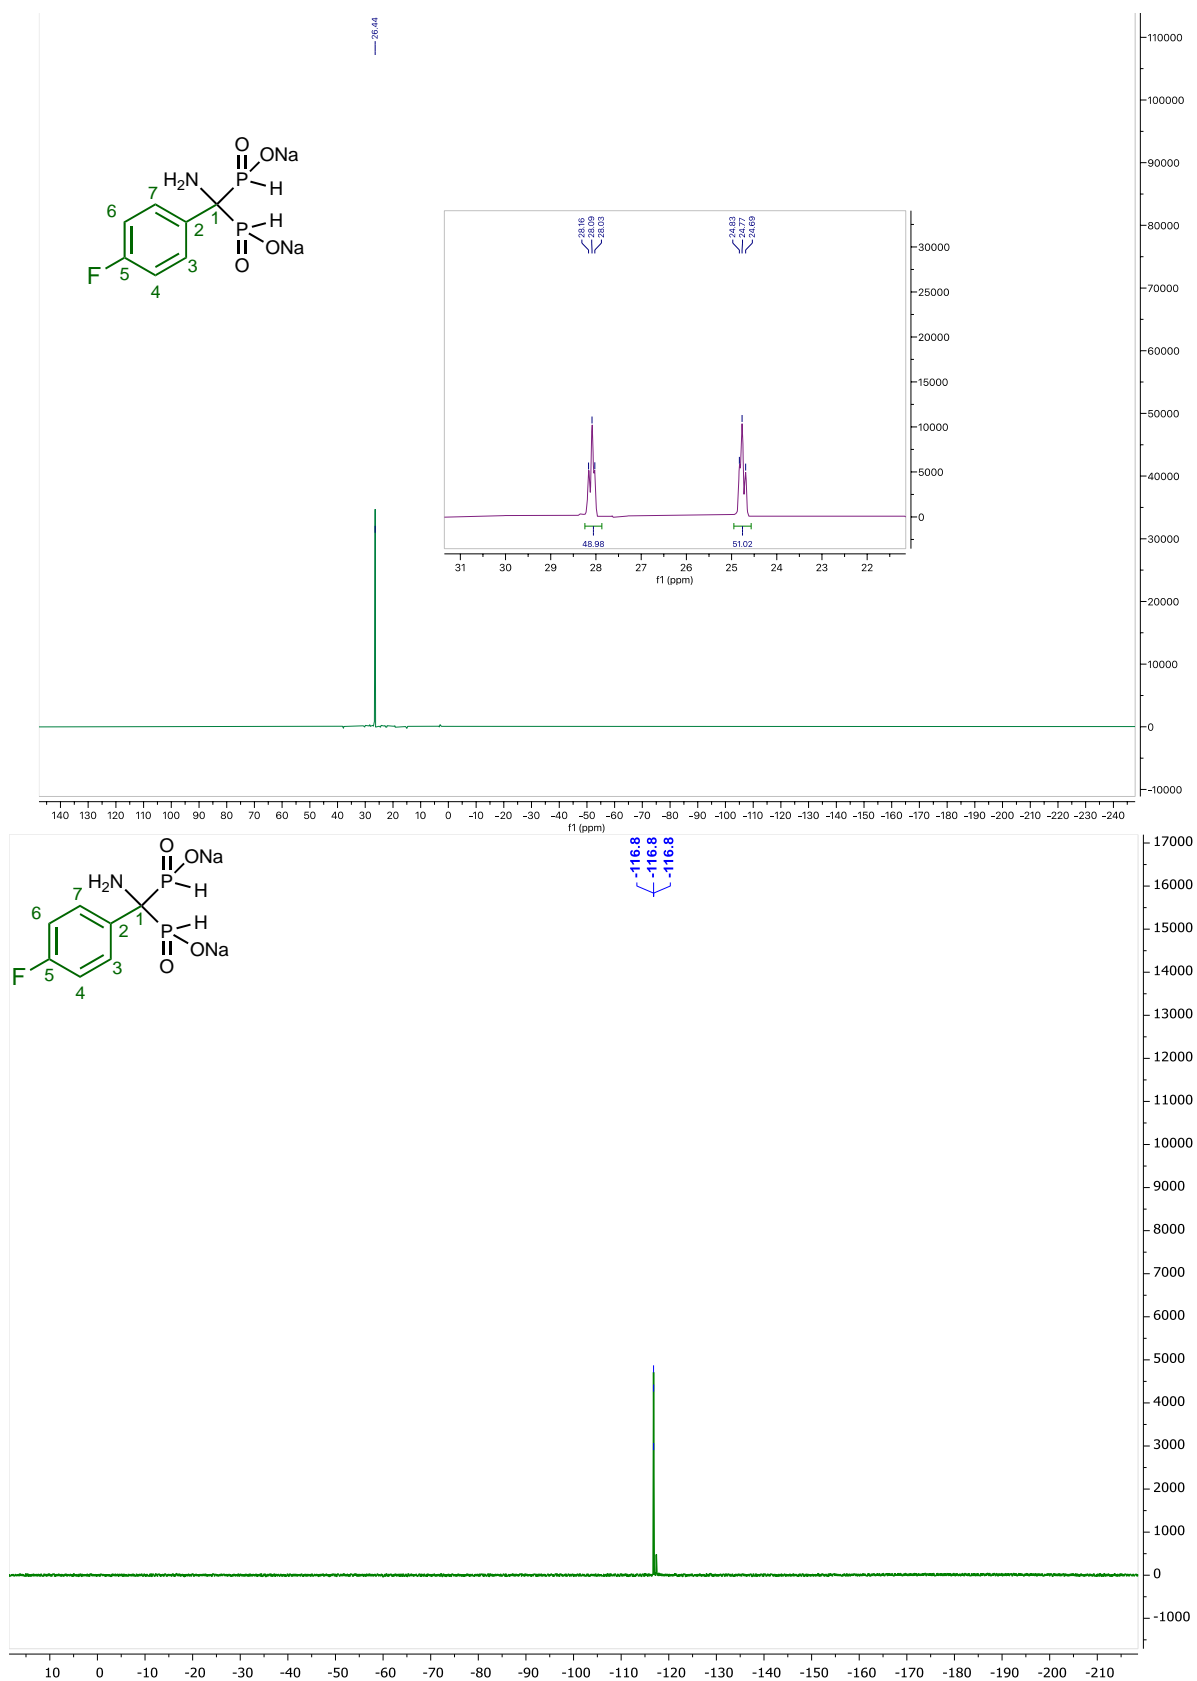

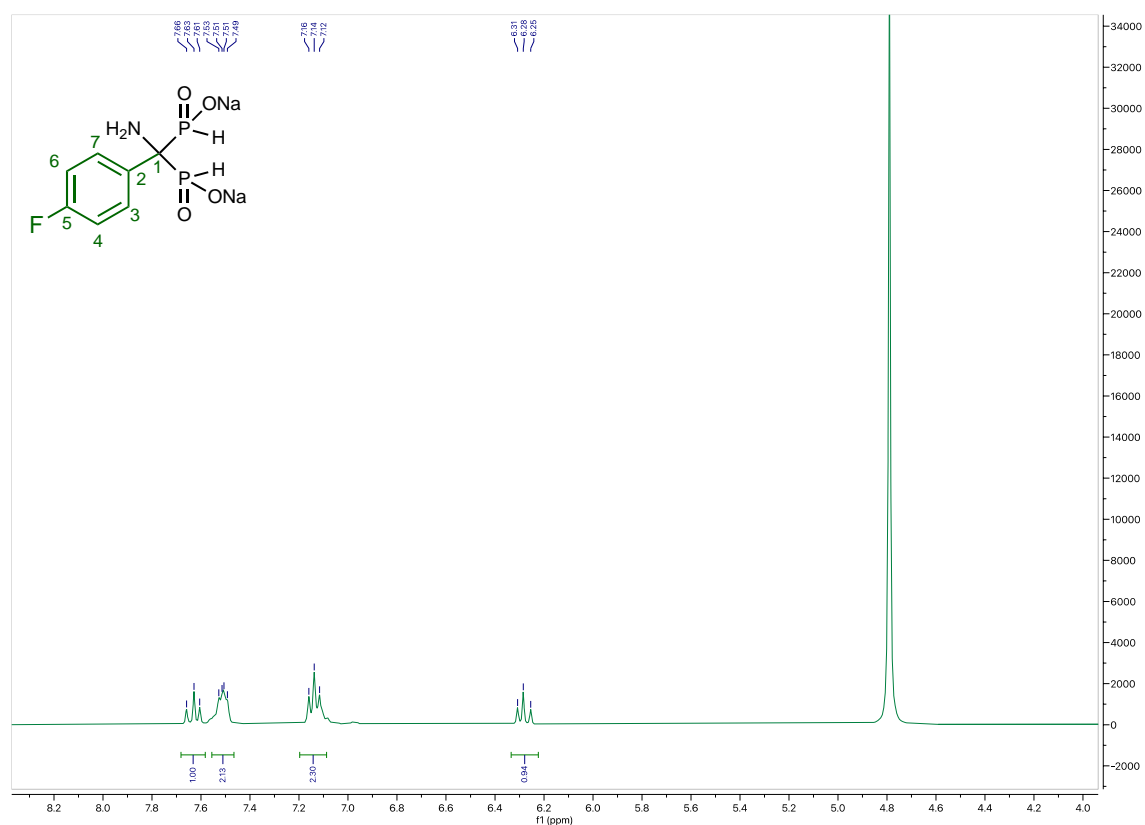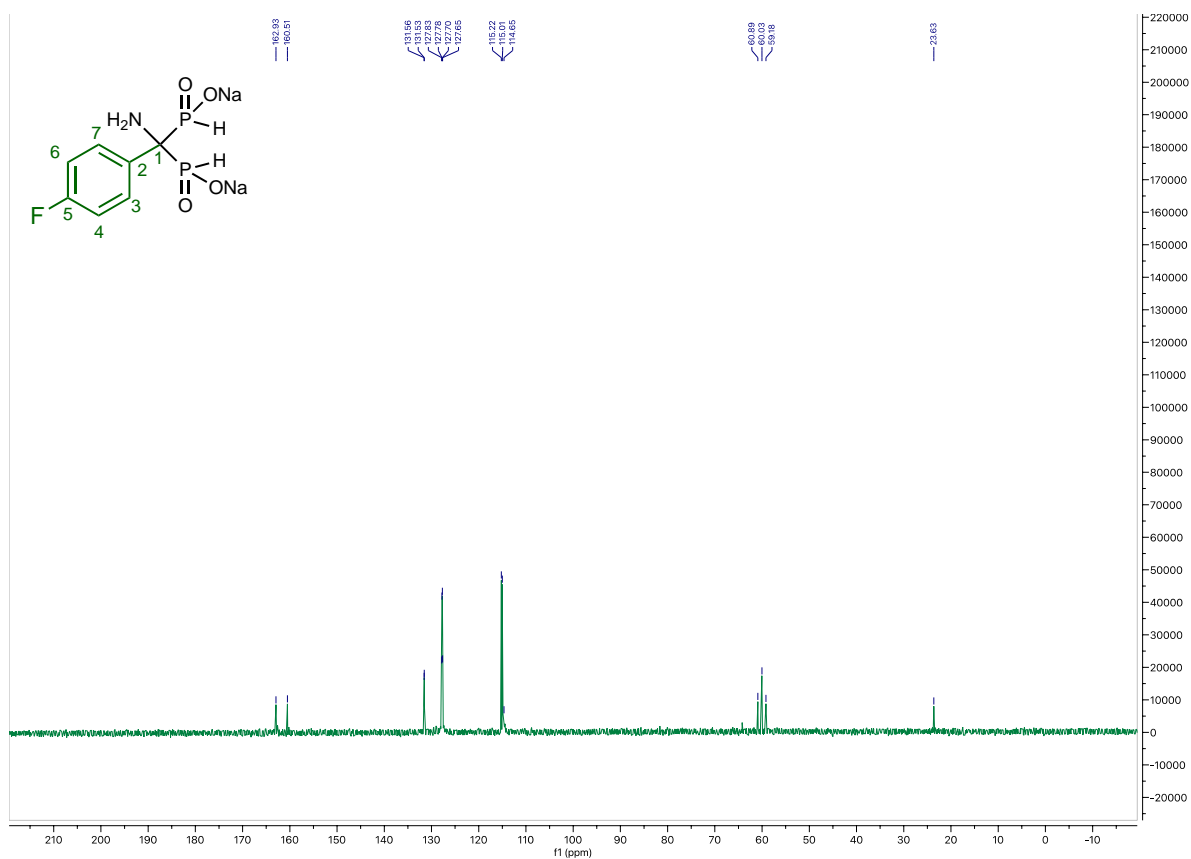

**Figure S6.** <sup>31</sup>P NMR spectrum (162 MHz, D<sub>2</sub>O), <sup>19</sup>F NMR spectrum (377 MHz, D<sub>2</sub>O), <sup>1</sup>H NMR spectrum (400 MHz, D<sub>2</sub>O), <sup>13</sup>C NMR (101 MHz, D<sub>2</sub>O) of 1-amino-1-(4-fluorophenyl)methane-1,1-bis(H-phosphinate) disodium salts **3g**

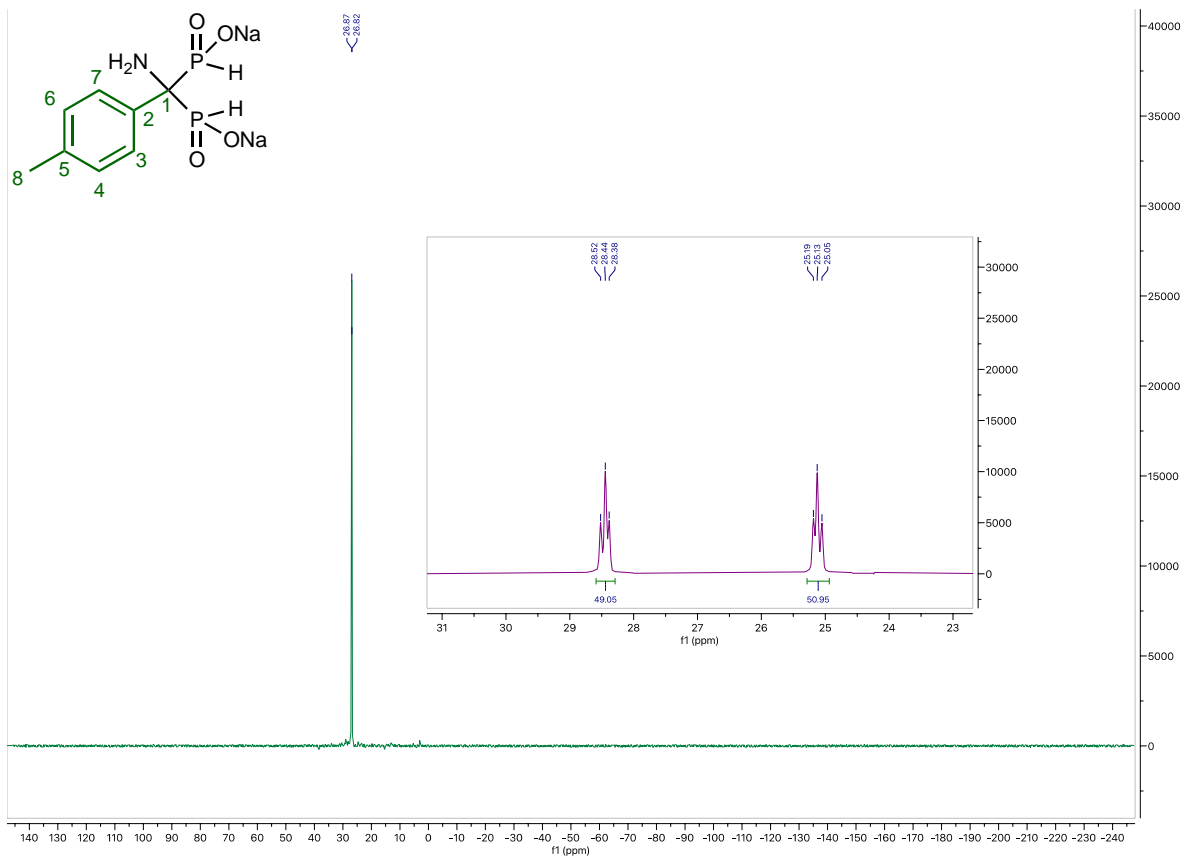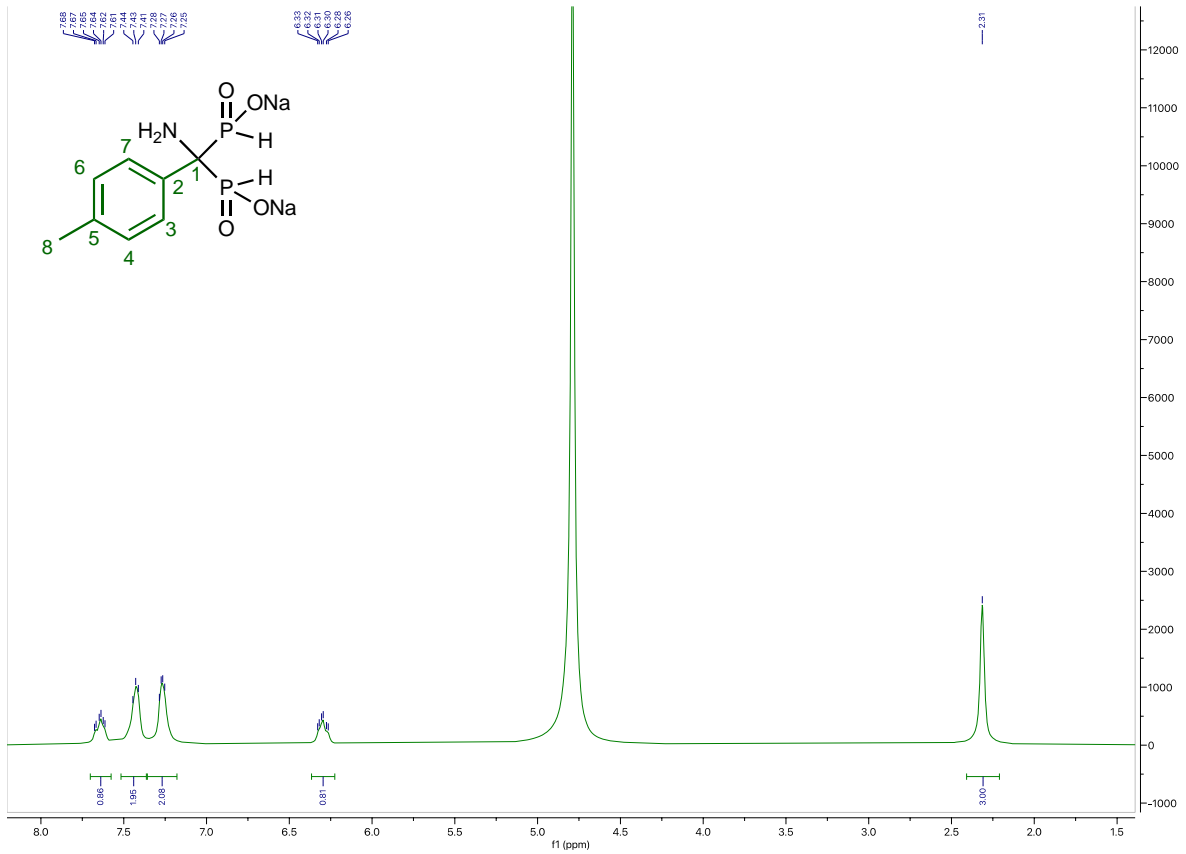

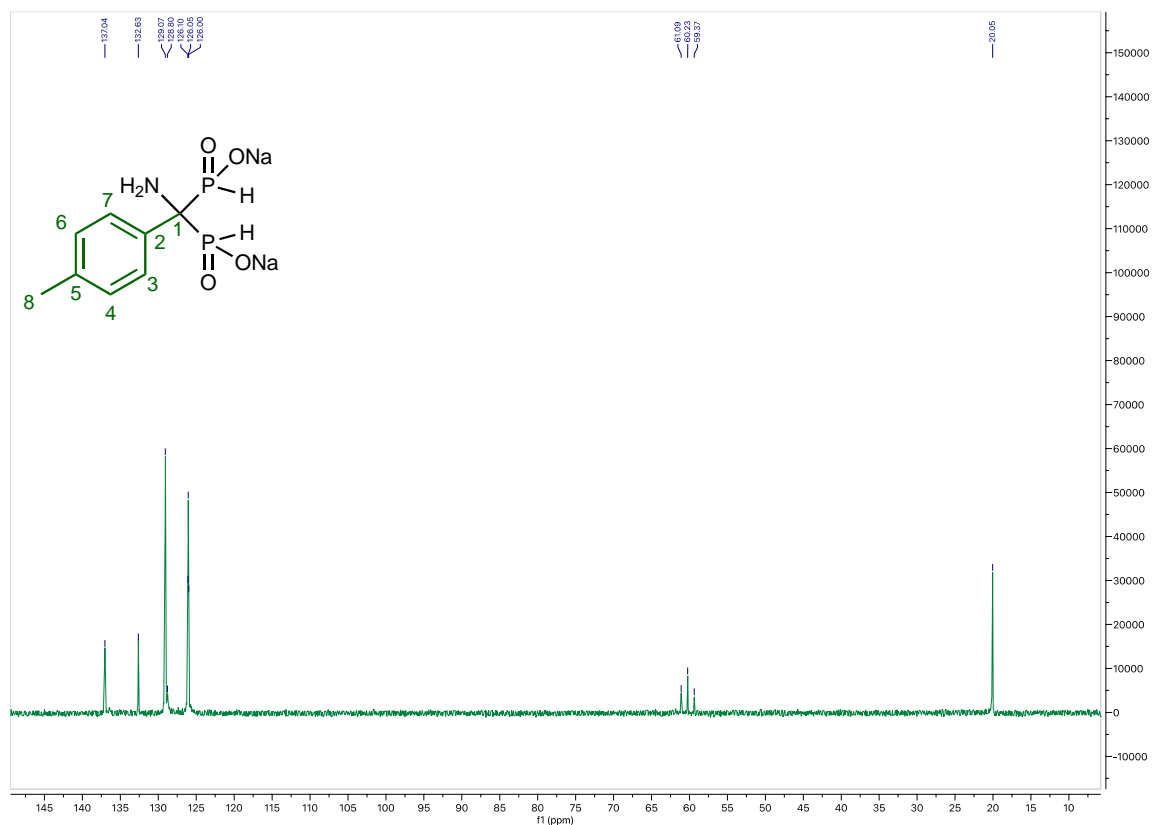

**Figure S7.**  $^{31}\text{P}$  NMR spectrum (162 MHz,  $\text{D}_2\text{O}$ ),  $^1\text{H}$  NMR spectrum (400 MHz,  $\text{D}_2\text{O}$ ),  $^{13}\text{C}$  NMR (101 MHz,  $\text{D}_2\text{O}$ ) of 1-amino-1-(4-tolyl)methane-1,1-bis(H-phosphinate) disodium salts **3i**

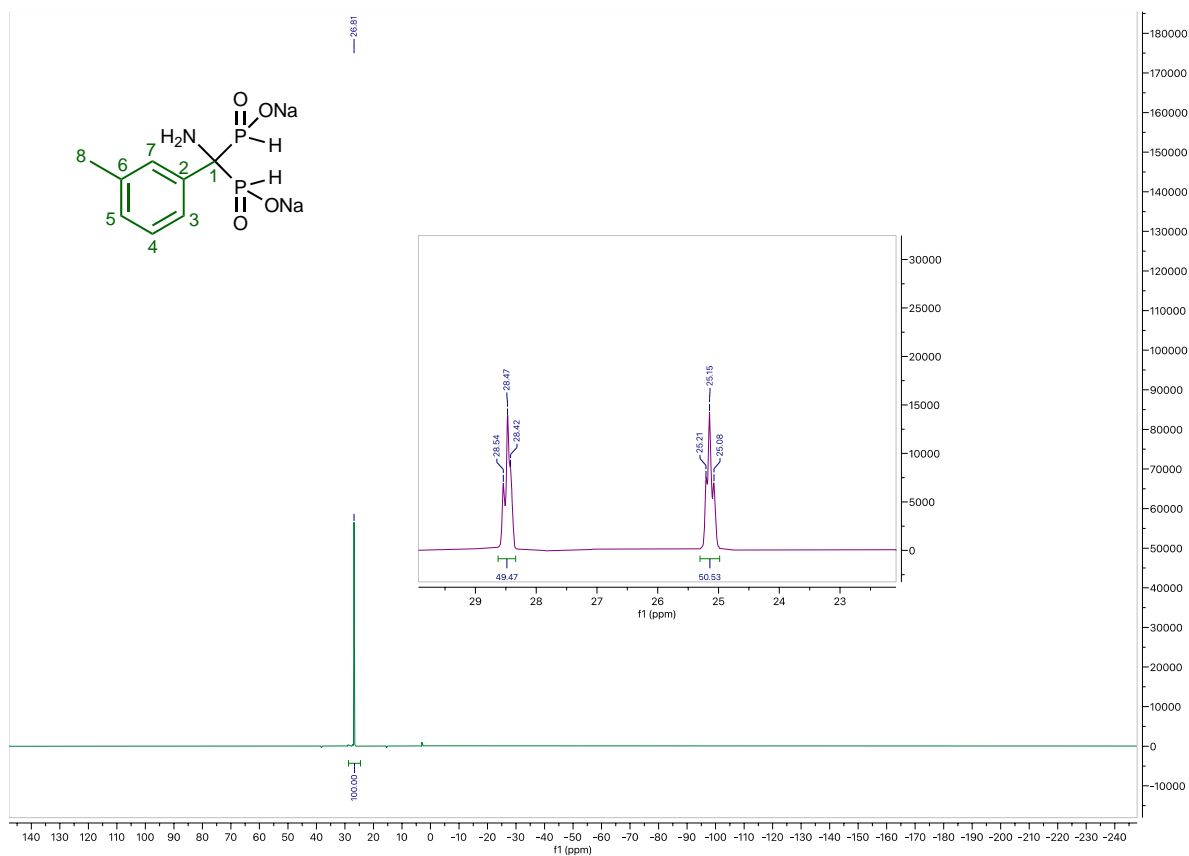

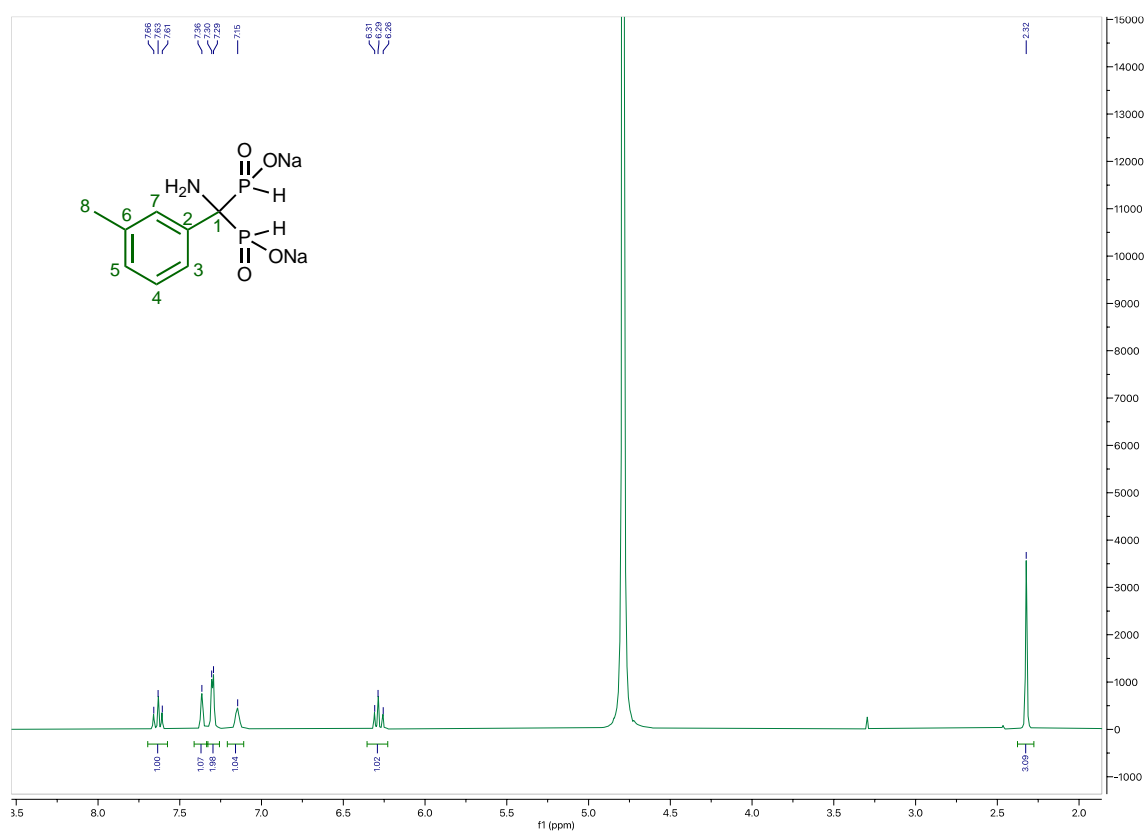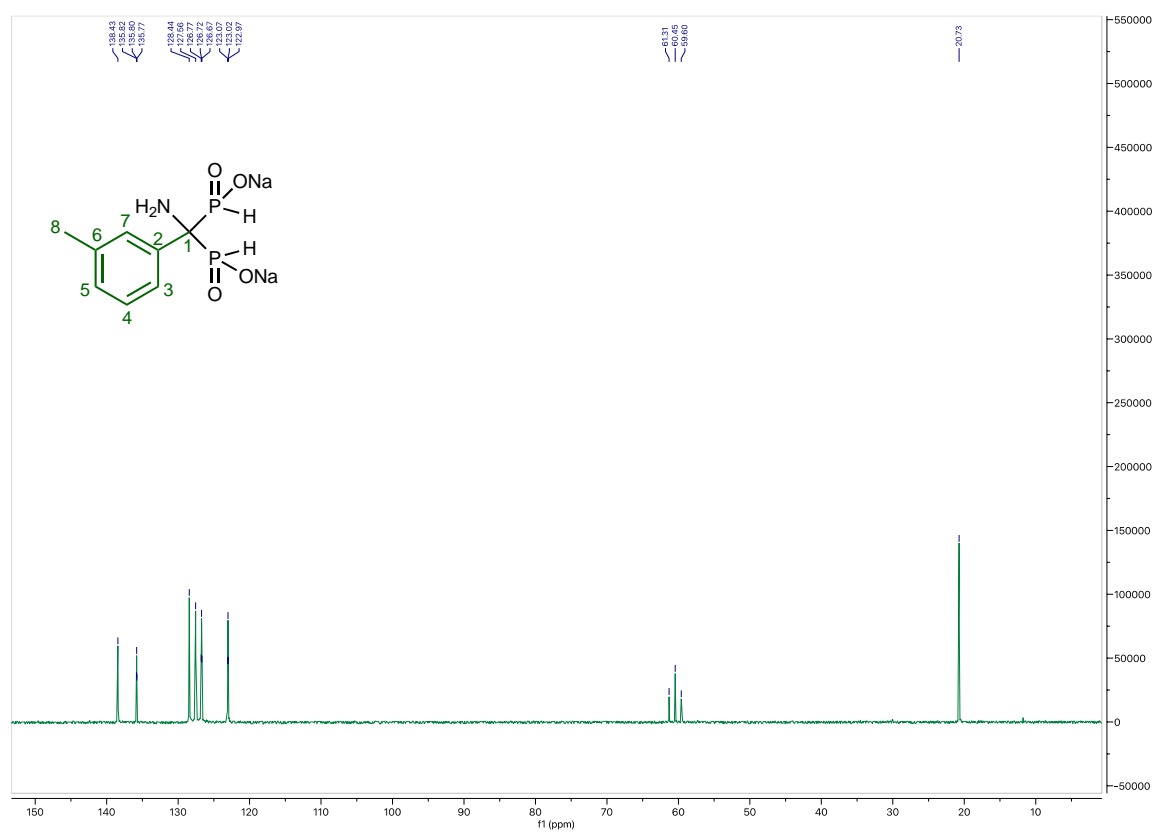

**Figure S8.** <sup>31</sup>P NMR spectrum (162 MHz, D<sub>2</sub>O), <sup>1</sup>H NMR spectrum (400 MHz, D<sub>2</sub>O), <sup>13</sup>C NMR (101 MHz, D<sub>2</sub>O) of 1-amino-1-(3-tolyl)phenyl)methane-1,1-bis(H-phosphinate) disodium salts **3j**





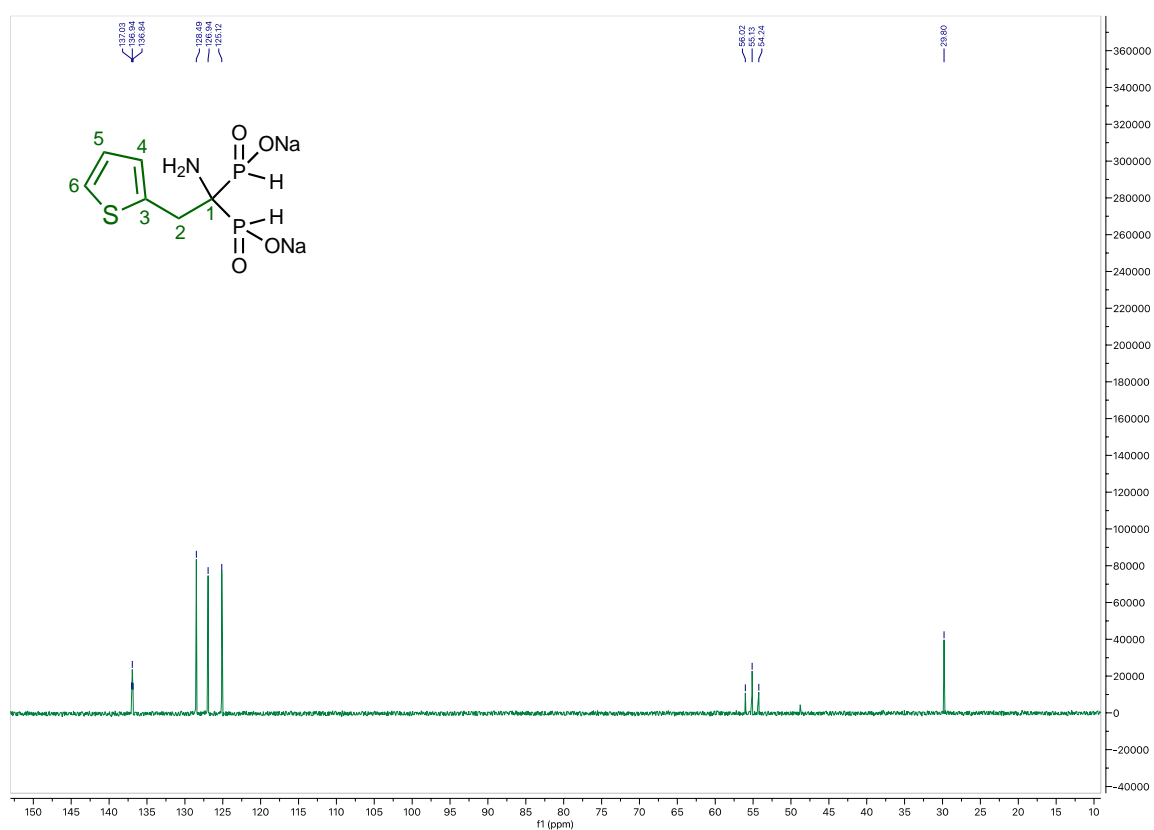

**Figure S9.** <sup>31</sup>P NMR spectrum (162 MHz, D<sub>2</sub>O), <sup>1</sup>H NMR spectrum (400 MHz, D<sub>2</sub>O), <sup>13</sup>C NMR (101 MHz, D<sub>2</sub>O) of 1-amino-1-(2-thienyl)ethane-1,1-bis(H-phosphinate) disodium salts **3l**.
